# Supplementary material
Source: MDPI journal article supplement (https://www.mdpi.com/1999-4907/14/7/1307)
Supplement: s1 [file s1]

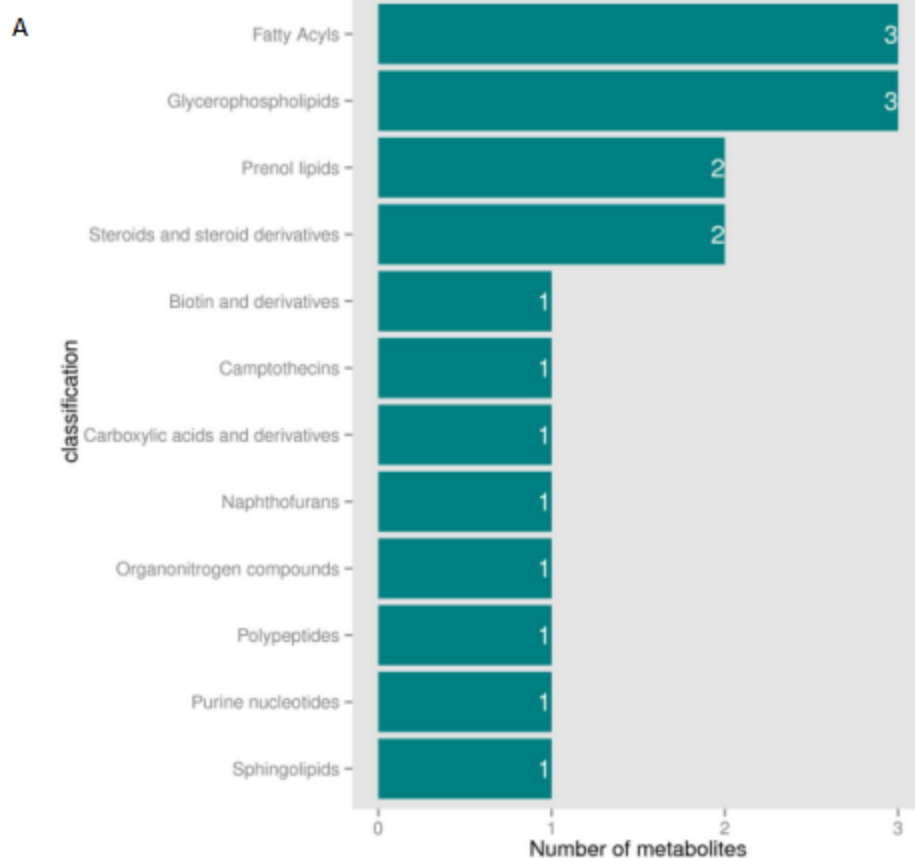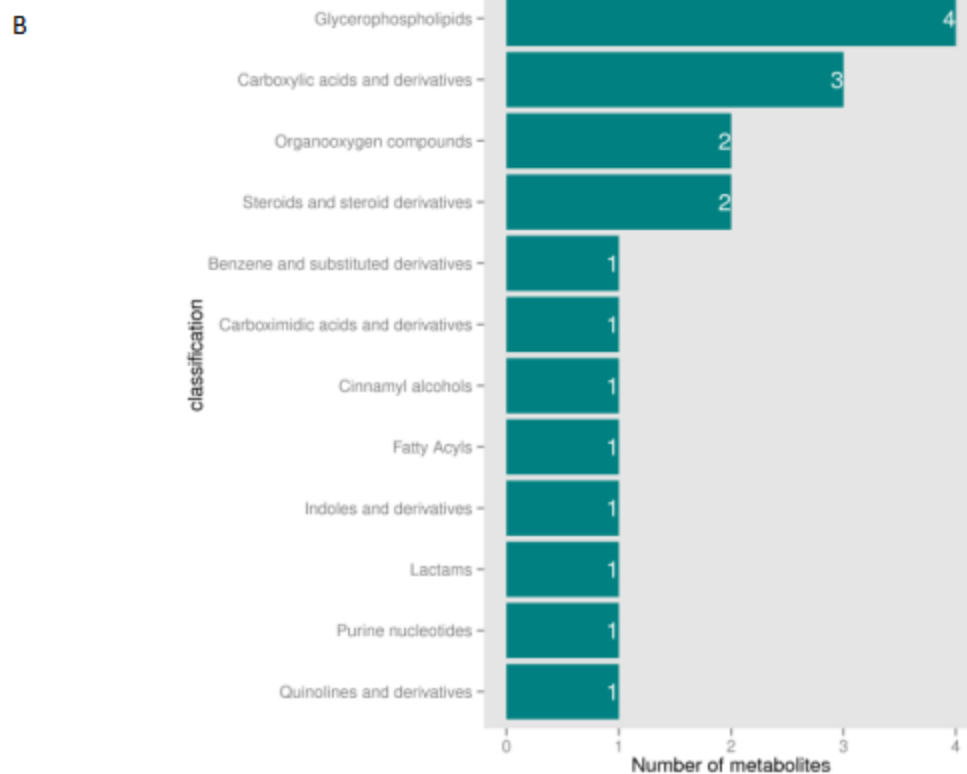

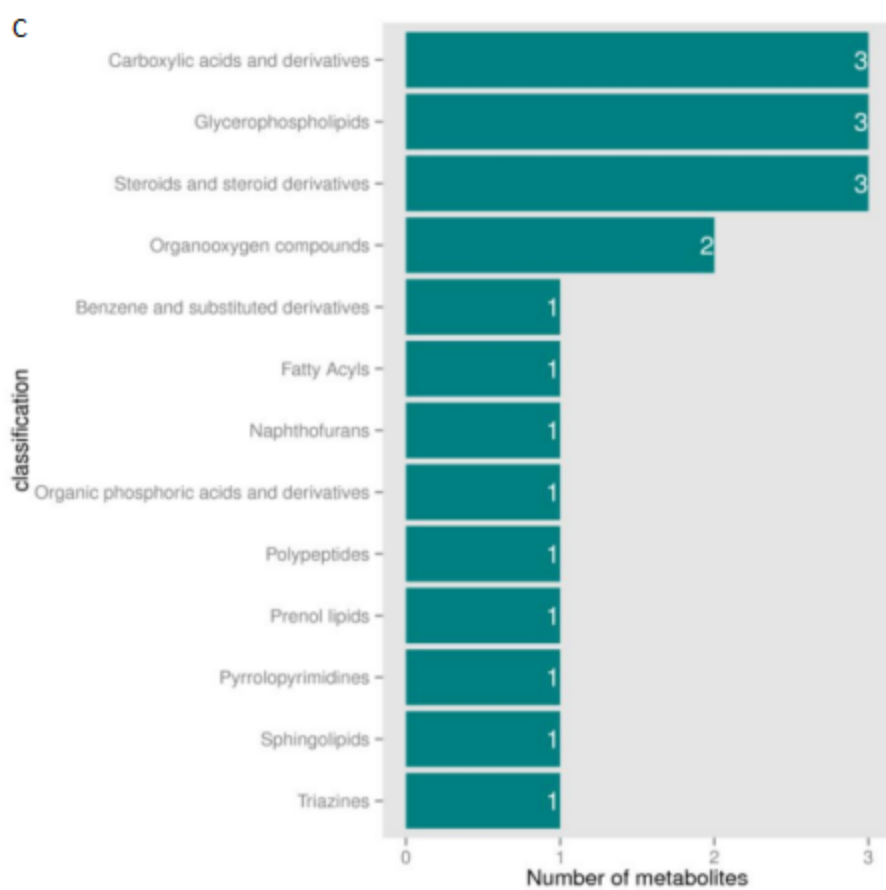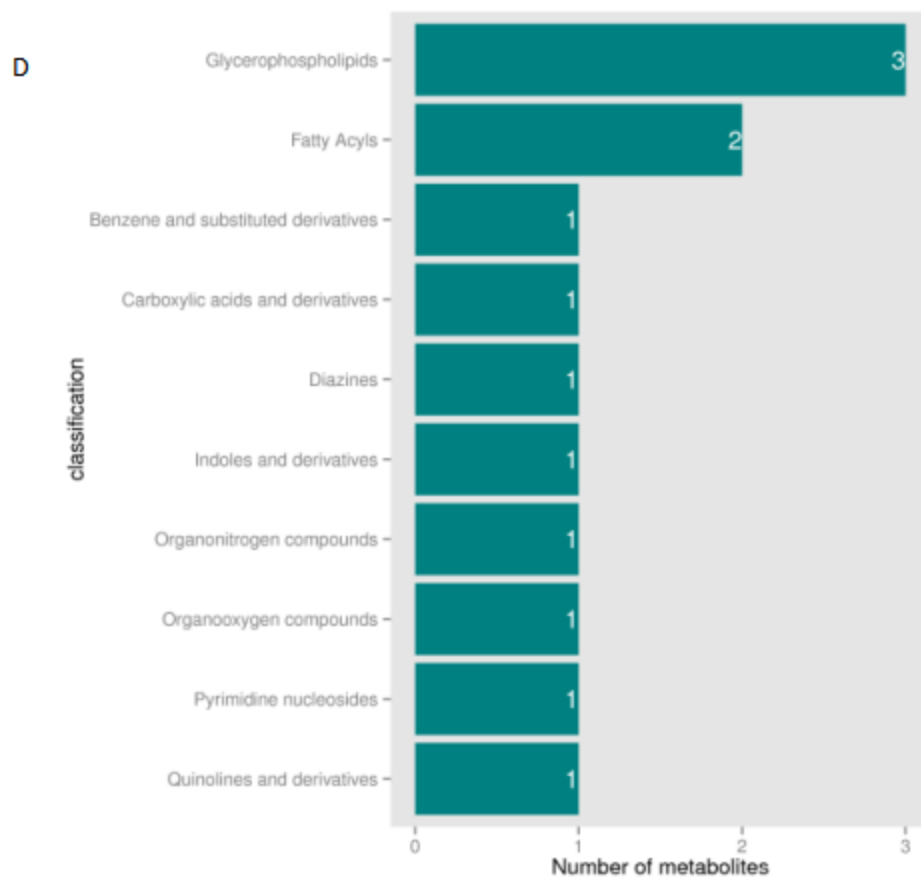

A: HMDB classification map of LL-LB differential metabolites in positive ion mode; B: HMDB classification map of LL-LB differential metabolites in negative ion mode; C: HMDB classification map of LL-LY differential metabolites in positive ion mode; D: HMDB classification map of LL-LY differential metabolites in negative ion mode.
